# Supplementary material for: Association between food intake and obesity in pregnant women living with and without HIV in Cape Town, South Africa: a prospective cohort study
Source: Springer Nature journal article supplement (doi:10.1186/s12889-021-11566-2), 2021-08-04

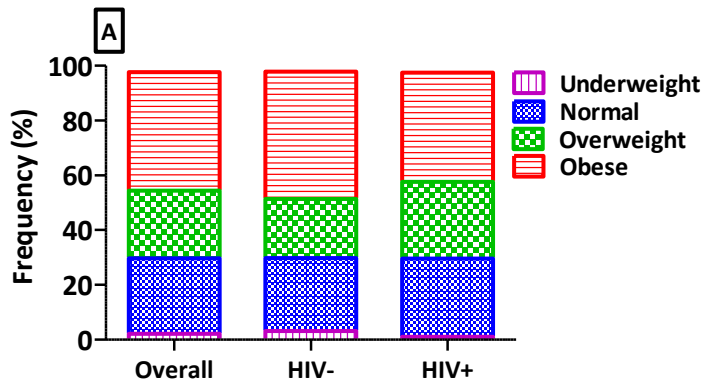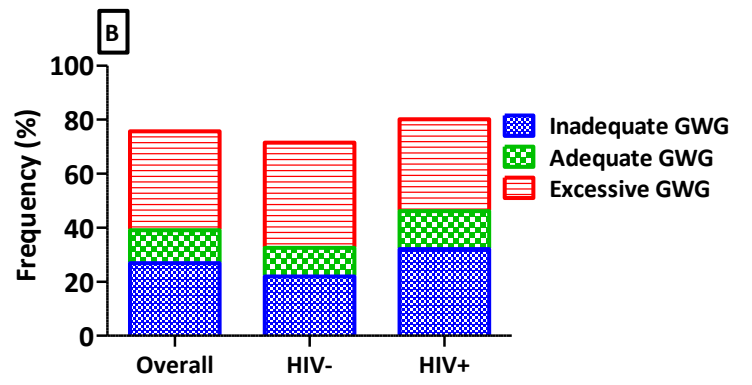

Supplement: MOESM1 [file 19542450]
